# Supplementary material for: Double-site recognition of Staphylococcus aureus using a metal–organic framework material with an alkaline hydrolysis property as a sensitive fluorescent probe
Source: Royal Society of Chemistry journal article supplement (doi:10.1039/d1nr02108g), 2021-01-01
Supplement: d1nr02108g1.pdf [file d1nr02108g1.pdf]

## Supporting Information

### **Double-site recognition of *Staphylococcus aureus* using metal-organic frameworks material with alkaline hydrolysis property as a sensitive fluorescent probe**

Junyi Wei, Lvxia Zhang, Hongling Yang, Lin Wang, and Zhifeng Fu\*

*Key Laboratory of Luminescence Analysis and Molecular Sensing (Ministry of Education), College of Pharmaceutical Sciences, Southwest University, Chongqing 400716, China*

---

\* Corresponding author.

E-mail address: fuzf@swu.edu.cn

### *Reagents and materials*

$\text{AlCl}_3 \cdot 6\text{H}_2\text{O}$  and DMF were both provided by Huaweiruike Chemical (China).  $\text{NH}_2\text{-H}_2\text{BDC}$  was provided by Sigma-Aldrich (USA). FITC, EDC and NHS were all gained from Aladdin (China). Carboxylated MBs with a diameter of 3  $\mu\text{m}$  were obtained from Biospes (China). BSA was gained from Leagene (China). Strains of *P. vulgaris*, *S. castellani*, *V. parahemolyticus*, *S. aureus* and *L. monocytogenes* were all gained from China Center for Type Culture Collection (China). Strains of *E. faecium* was gained from Guangdong Microbiology Culture Center (China). Dialysis cassette with MWCO of 1000 Da was gained from Thermo Fisher Scientific (USA). Polystyrene 96-well black microplates were obtained from Corning (USA). Pomegranate green tea and milk was gained from a local market. Glucose injection was gained from a local hospital. Saliva sample was collected from a healthy female volunteer.

### *Instrumentations*

FL signals were collected using a F-7000 FL spectrophotometer (Hitachi, Japan). TEMs of MOFs  $\text{NH}_2\text{-MIL-53(Al)}$  and  $\text{NH}_2\text{-MIL 53(Al)@TEI}$  were obtained using a JEM 1200EX transmission electron microscope (JEOL, Japan). XRD pattern of MOFs  $\text{NH}_2\text{-MIL-53(Al)}$  was obtained using a D8 ADVANCE X-ray powder diffractometer (Bruker, Germany). XPS patterns of MOFs  $\text{NH}_2\text{-MIL-53(Al)}$  and  $\text{NH}_2\text{-MIL 53(Al)@TEI}$  were obtained using an Escalab 250Xi XPS spectrometer (Thermo Fisher Scientific, USA). FL imaging of stained bacterial cells were conducted on a Ni-U FL microscope (Nikon Instruments Co., Ltd., Japan). UV-vis absorption spectra of MOFs  $\text{NH}_2\text{-MIL-53(Al)}$ , hydrolyzed MOFs  $\text{NH}_2\text{-MIL-53(Al)}$  and  $\text{NH}_2\text{-H}_2\text{BDC}$  were measured using an

Infinite 200 microplate reader (Tecan, Austria). SEMs of NH<sub>2</sub>-MIL-53(Al)@TEI incubated with *S. aureus*, MBs-pig IgG incubated with *S. aureus*, as well as NH<sub>2</sub>-MIL-53(Al)@TEI and MBs-pig IgG incubated with *S. aureus* were obtained using a JSM-7100F thermal field emission scanning electron microscope (JEOL, Japan).

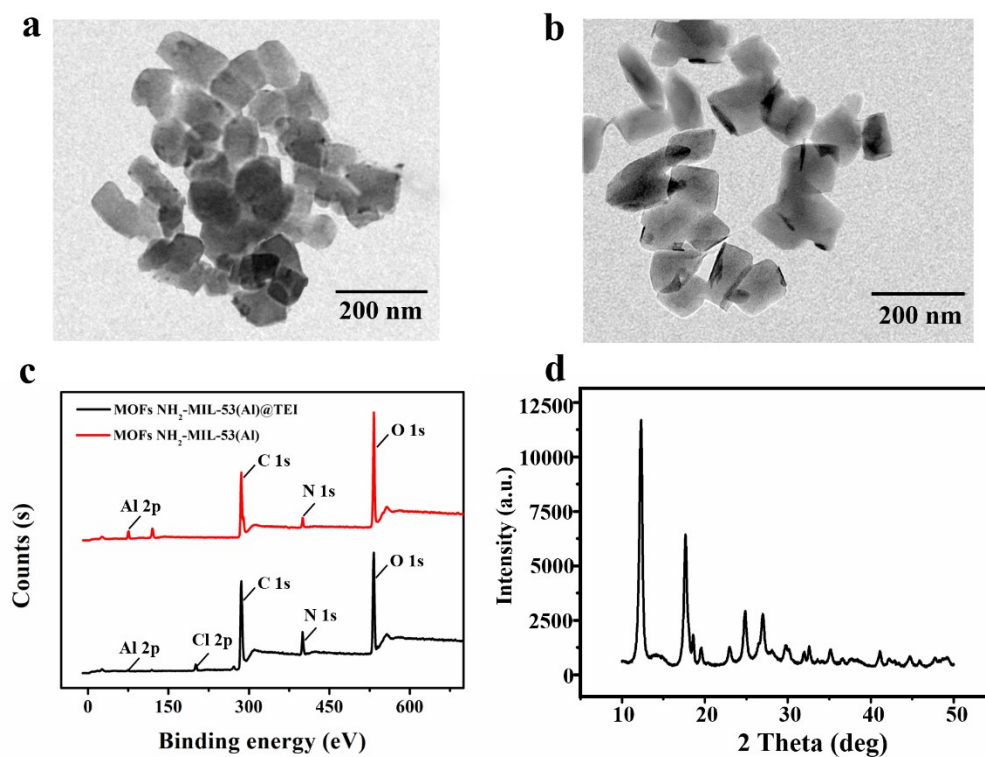

Figure S1. (a) TEM of MOFs  $\text{NH}_2\text{-MIL-53(Al)}$ . (b) TEM of  $\text{NH}_2\text{-MIL-53(Al)@TEI}$ . (c) XPS patterns of MOFs  $\text{NH}_2\text{-MIL-53(Al)}$  and  $\text{NH}_2\text{-MIL-53(Al)@TEI}$ . (d) XRD pattern of MOFs  $\text{NH}_2\text{-MIL-53(Al)}$ .

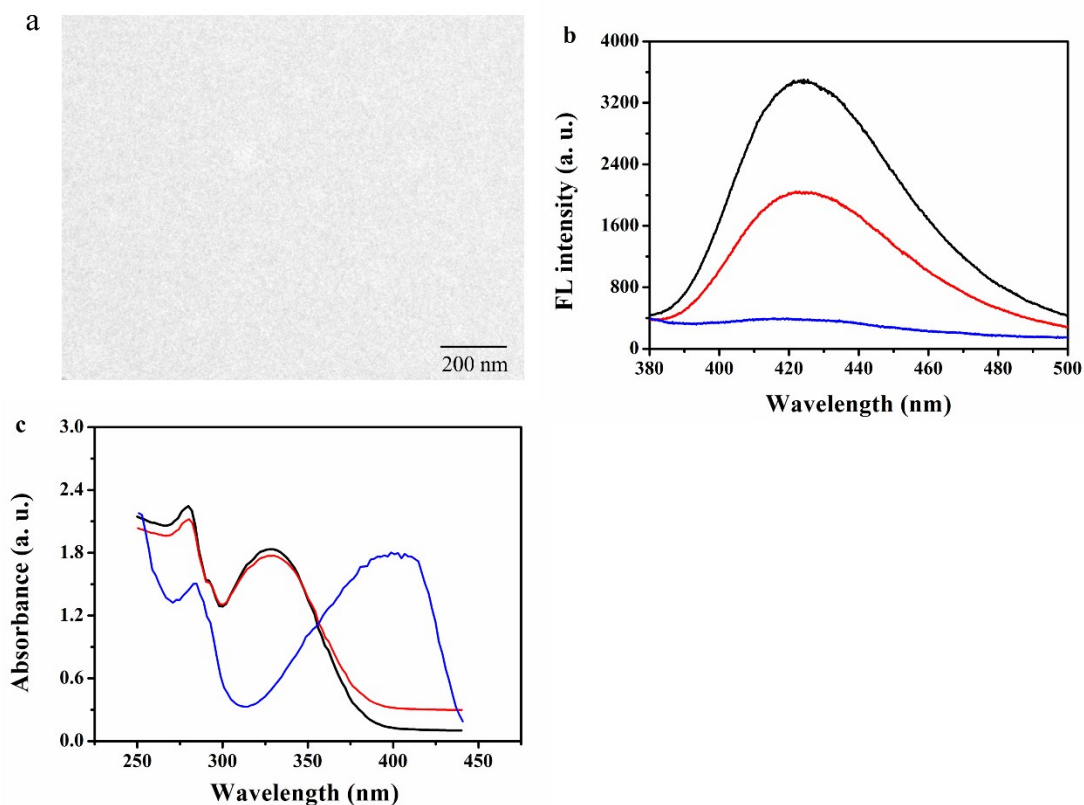

Figure S2. (a) TEM of hydrolyzed MOFs NH<sub>2</sub>-MIL-53(Al). (b) FL emission spectra of MOFs NH<sub>2</sub>-MIL-53(Al) (blue), hydrolyzed MOFs NH<sub>2</sub>-MIL-53(Al) (red) and NH<sub>2</sub>·H<sub>2</sub>BDC (black). The concentration of MOFs NH<sub>2</sub>-MIL-53(Al) and NH<sub>2</sub>·H<sub>2</sub>BDC was 50 ng mL<sup>-1</sup>. (c) UV-vis absorption spectra of MOFs NH<sub>2</sub>-MIL-53(Al) (blue), hydrolyzed MOFs NH<sub>2</sub>-MIL-53(Al) (black) and NH<sub>2</sub>·H<sub>2</sub>BDC (red). The concentration of MOFs NH<sub>2</sub>-MIL-53(Al) and NH<sub>2</sub>·H<sub>2</sub>BDC was 500 µg mL<sup>-1</sup>, the concentration of NH<sub>2</sub>·H<sub>2</sub>BDC was 100 µg mL<sup>-1</sup>.
